# Supplementary material
Source: Research Square preprint supplement (doi:10.21203/rs.3.rs-9171899/v1)
Supplement: Supplementary file 1 [file 178da16fa8defa12d4f84d37.docx]

**Supplementary Table 1. Comparison of baseline demographic and clinical characteristics between patients with and without renal cyst development (total n=283 patients).**

| **Parameters** | **Renal cyst*, n (%)*** | | **p value** |
| --- | --- | --- | --- |
| **Present, n=116** | **Absent, n=167** |
| Age, (mean±SD), years | 61.8±11.4 | 54.3±12.3 | ***<0.001*** |
| Gender  Male  Female | 68 (58.6)  48 (41.4) | 81 (48.5)  86 (51.5) | 0.094 |
| Onset age of symptoms, (mean±SD), years | 41±12 | 35.7±11.4 | ***<0.001*** |
| Diagnosis age, (mean±SD), years | 44.6±11.7 | 38.7±11.7 | ***<0.001*** |
| Duration of symptomatic period before diagnosis, years (median (min-max)) | 2 (0-35) | 2 (0-20) | 0.434 |
| Estimated duration of the disease, years (median (min-max)) | 19 (5-51) | 17 (5-43) | 0.078 |
| Smoking status, (n=259) | 46/99 (46.5) | 49/129 (38) | 0.198 |
| Alcohol use, (n=256) | 13/97 (13.4) | 16/128 (12.5) | 0.841 |
| BMI, (mean±SD), kg/m2 | 29.6±5.2 | 30.3±6.2 | 0.346 |

SD: standard deviation, BMI: body mass index.

**Supplementary Table 2. Evaluation of the relationship between the presence of renal cyst and comorbid diseases and symptoms (total n=283 patients)**

|  | **Renal cyst*, n (%)*** | | **p value** |
| --- | --- | --- | --- |
| **Present, n=116** | **Absent, n=167** |
| Thyroid nodule | 83/111 (74.8) | 110/154 (71.4) | 0.546 |
| Obstructive Sleep Apnea | 35/44 (79.5) | 32/49 (65.3) | 0.127 |
| Hyperlipidemia | 83 (71.6) | 100 (59.9) | ***0.043*** |
| Diabetes mellitus | 61 (52.6) | 66 (39.5) | ***0.030*** |
| Pulmonary nodule | 54/105 (51.4) | 57/141 (40.4) | 0.086 |
| Hypertension | 63 (54.3) | 67 (40.1) | ***0.018*** |
| Nephrolithiasis | 26/116 (22.4) | 16/167 (9.6) | ***0.003*** |
| Gallstones | 44/112 (39.3) | 59/166 (35.5) | 0.526 |
| Hepatic steatosis | 29/114 (25.4) | 57/164 (34.8) | 0.098 |
| Hypopituitarism | 34 (29.3) | 54 (32.3) | 0.589 |
| Liver cysts | 28/114 (24.6) | 16/164 (9.8) | ***<0.001*** |
| Left ventricular hypertrophy | 30/112 (26.8) | 25/149 (16.8) | ***0.050*** |
| Coronary artery disease | 32 (27.6) | 30 (16.7) | 0.054 |
| Neoplasm | 68 (58.6) | 76 (45.5) | ***0.030*** |
| Multiple neoplasms (>1) | 34 (29.3) | 24 (14.4) | ***0.002*** |
| Cancer | 32 (27.6) | 32 (19.2) | 0.096 |
| K+ at diagnosis, mean±SD, mEq/L | 4.26±0.4 | 4.36±0.4 | ***0.041*** |

K: Potassium, SD: standard deviation.

**Supplementary Table 3. Comparison of baseline demographic and clinical characteristics between patients with and without chronic kidney disease (total n=354 patients)**

| **Parameters** | **Chronic kidney disease*, n (%)*** | | **p value** |
| --- | --- | --- | --- |
| **Present, n=57** | **Absent, n=297** |
| Age, (mean±SD), years | 64.7±11.2 | 55±12.2 | ***<0.001*** |
| Gender  Male  Female | 38 (66.7)  19 (33.3) | 140 (47.1)  157 (52.9) | ***0.007*** |
| Onset age of symptoms, (mean±SD), years | 42.3±13.5 | 36.8±11.7 | ***0.002*** |
| Diagnosis age, (mean±SD), years | 45.7±12.5 | 39.8±12 | ***<0.001*** |
| Duration of symptomatic period before diagnosis, years (median (min-max)) | 2 (0-35) | 2 (0-20) | 0.548 |
| Estimated duration of the disease, years (median (min-max)) | 19 (9-51) | 16 (5-43) | ***0.003*** |
| Smoking status | 19/44 (43.2) | 82/210 (39) | 0.610 |
| Alcohol use | 6/43 (14) | 25/208 (12) | 0.726 |
| BMI, (mean±SD), kg/m2 | 30.1±5.5 | 30±5.9 | 0.915 |

SD: standard deviation, BMI: body mass index.

**Supplementary Table 4. Comparison of current kidney lengths and eGFR measurements at diagnosis and last follow-up between patients with and without chronic kidney disease (total n=354 patients)**

| **Parameters** | **Chronic kidney disease, *n*** | | **p value** |
| --- | --- | --- | --- |
| **Present, n=57** | **Absent, n=297** |
| Left kidney longitudinal length, mean±SD, mm, n=222 | 105.1±16.0 | 113.0±12.1 | ***0.024*** |
| Right kidney longitudinal length, mean±SD, mm, n=222 | 104.4±15.9 | 109.7±12.2 | ***0.022*** |
| Left kidney transverse length, mean±SD, mm, n=222 | 56.7±9.4 | 58.2±7.5 | 0.301 |
| Right kidney transverse length, mean±SD, mm, n=222 | 52.4±8.9 | 53.0±6.7 | 0.609 |
| eGFR at diagnosis, mean±SD, mL/min/1.73m2, n=318 | 85.3±18.3 | 103.6±14.4 | ***<0.001*** |
| eGFR at last follow-up, mean±SD, mL/min/1.73m2, n=349 | 62.3±19.0 | 98.4±13.4 | ***<0.001*** |

SD: Standard deviation, eGFR: estimated glomerular filtration rate (calculated using the CKD-EPI 2021 formula)

**Supplementary Table 5. Evaluation of the relationship between chronic kidney disease and comorbidities (total n=354 patients)**

| **Parameters** | **Chronic kidney disease*, n (%)*** | | **p value** |
| --- | --- | --- | --- |
| **Present, n=57** | **Absent, n=297** |
| Thyroid nodule | 44/49 (89.8) | 169/241 (70.1) | ***0.004*** |
| Obstructive Sleep Apnea | 16/21 (76.2) | 57/82 (69.5) | 0.548 |
| Hyperlipidemia | 44 (77.2) | 172 (57.9) | ***0.006*** |
| Diabetes mellitus | 36 (63.2) | 120 (40.4) | ***0.002*** |
| Pulmonary nodule | 26/46 (56.5) | 87/209 (41.6) | 0.066 |
| Hypertension | 42 (73.7) | 116 (39.1) | ***<0.001*** |
| Nephrolithiasis | 17/50 (34) | 25/233 (10.7) | ***<0.001*** |
| Gallstones | 24/49 (49) | 83/236 (35.2) | 0.069 |
| Hepatic steatosis | 13/49 (26.5) | 74/230 (32.2) | 0.439 |
| Hypopituitarism | 19 (33.3) | 86 (29) | 0.508 |
| Liver cysts | 11/49 (22.4) | 33/230 (14.3) | 0.158 |
| Left ventricular hypertrophy | 19/51 (37.3) | 39/250 (15.6) | ***<0.001*** |
| Coronary artery disease | 21 (36.8) | 47 (15.8) | ***<0.001*** |
| Neoplasm | 34 (59.6) | 113 (38.0) | ***0.002*** |
| Multiple neoplasms (>1) | 17 (29.8) | 41 (13.8) | ***0.003*** |
| Cancer | 16 (28.1) | 49 (16.5) | ***0.039*** |
